# Supplementary material
Source: PubMed Central journal article supplement (PMC5683091)
Supplement: NIHMS907098-supplement-10.pdf [file NIHMS907098-supplement-10.pdf]

**Supplementary Figure 9**

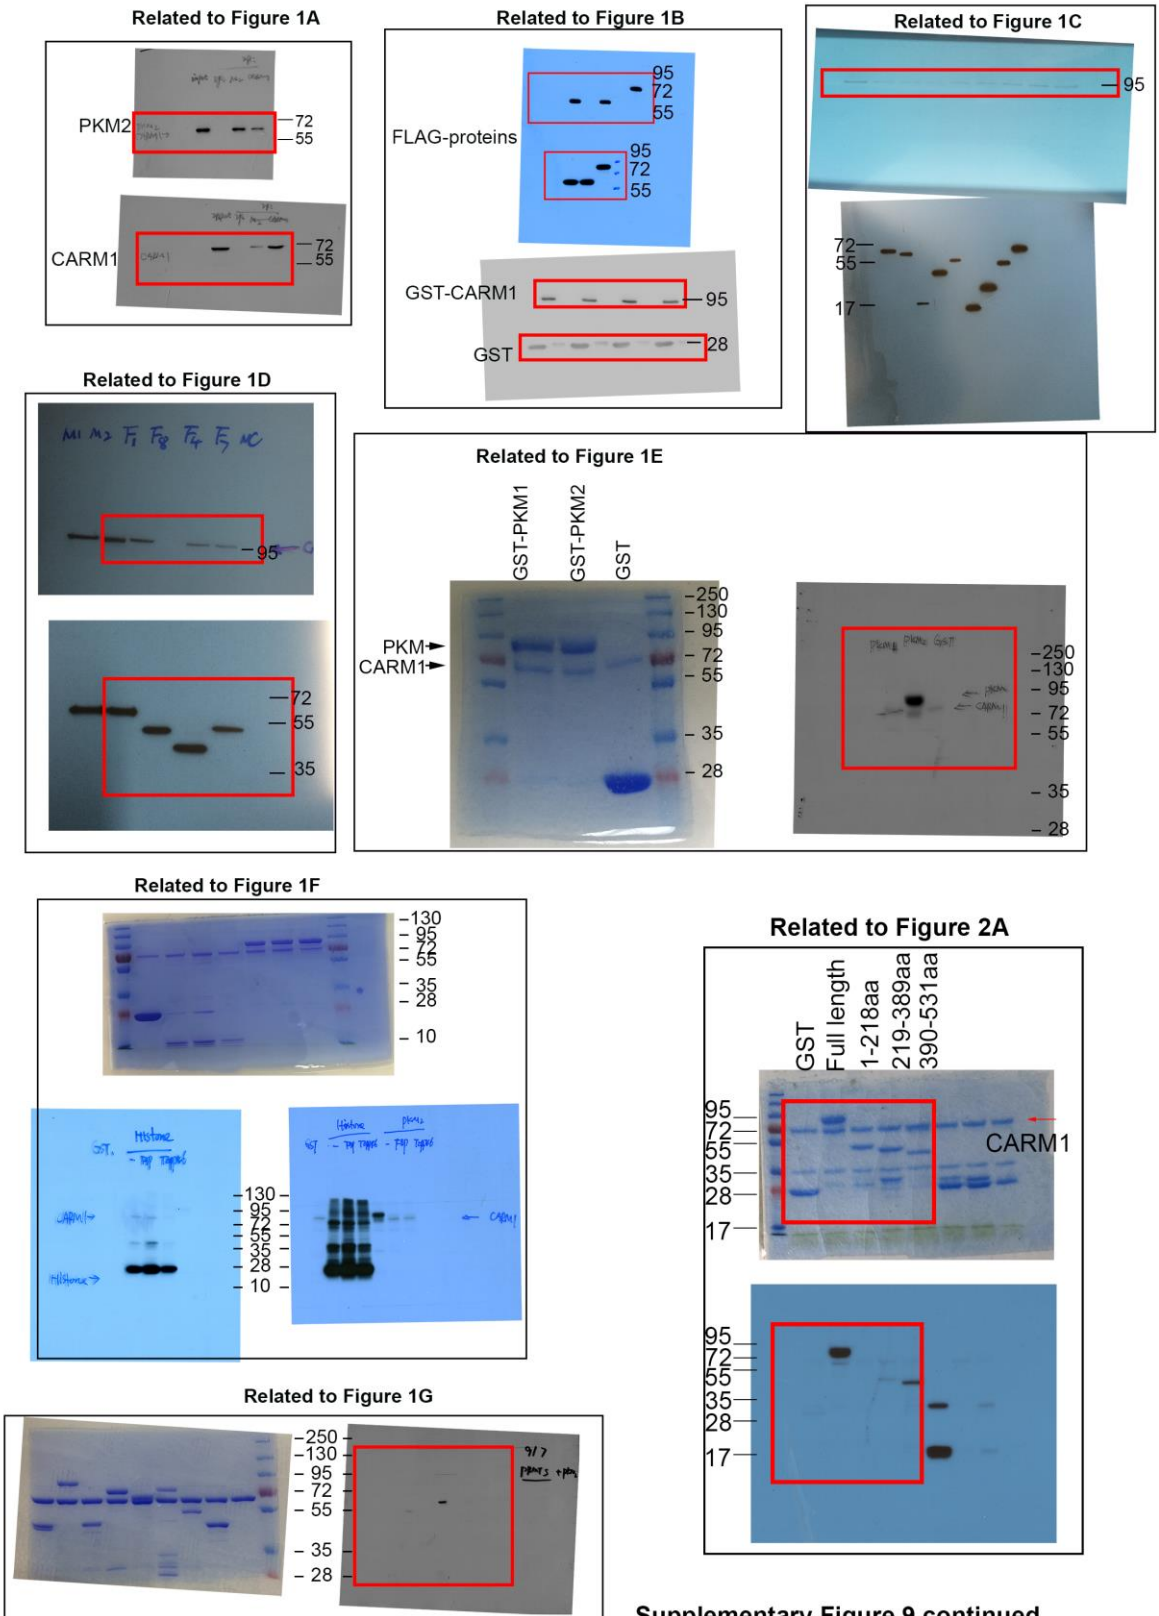

Supplementary Figure 9 continued

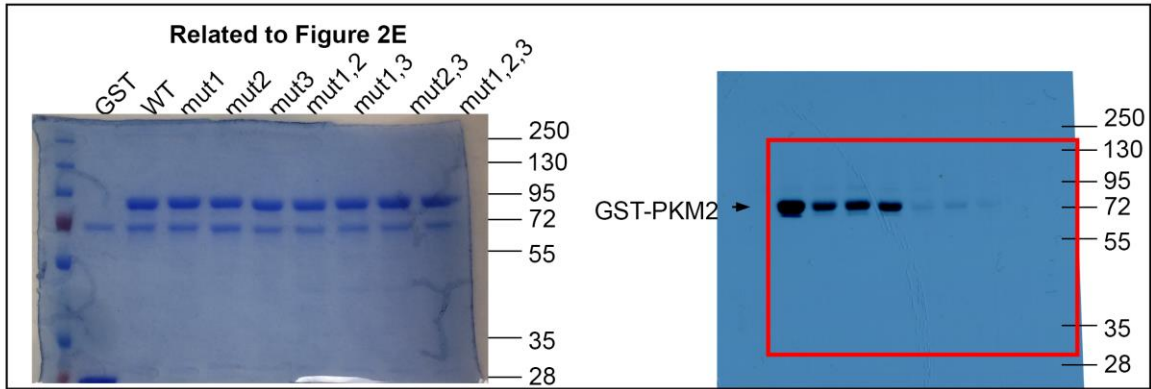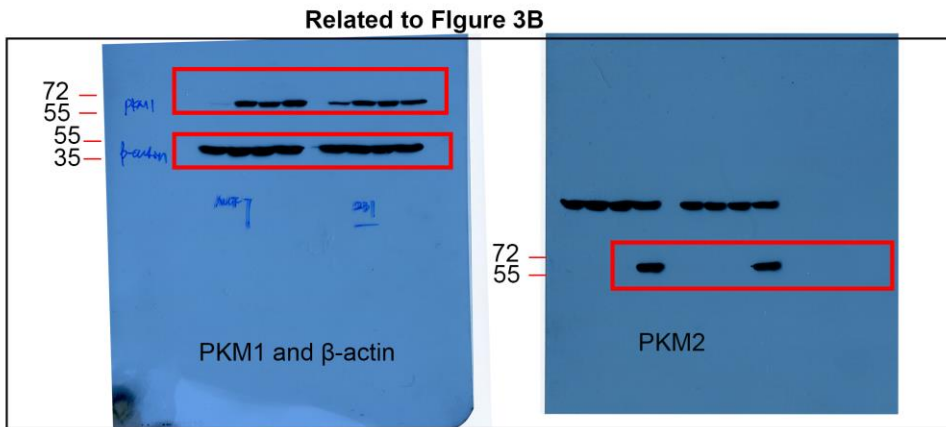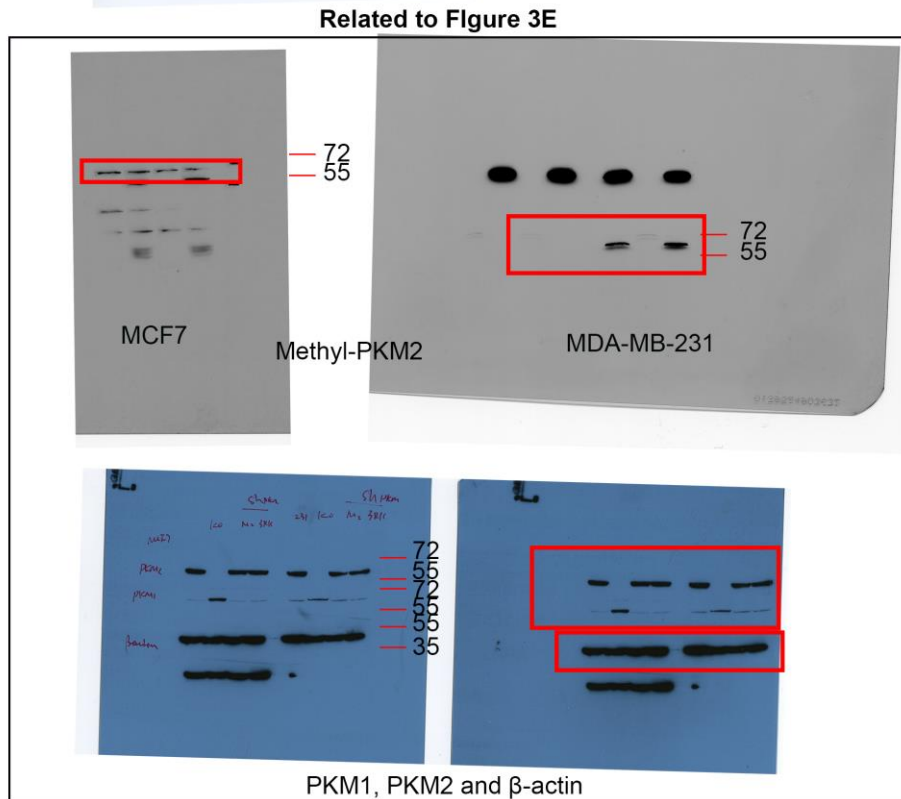

Supplementary Figure 9 continued

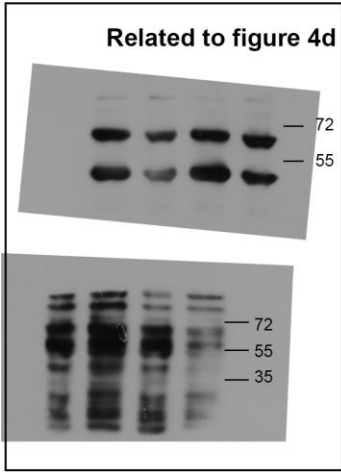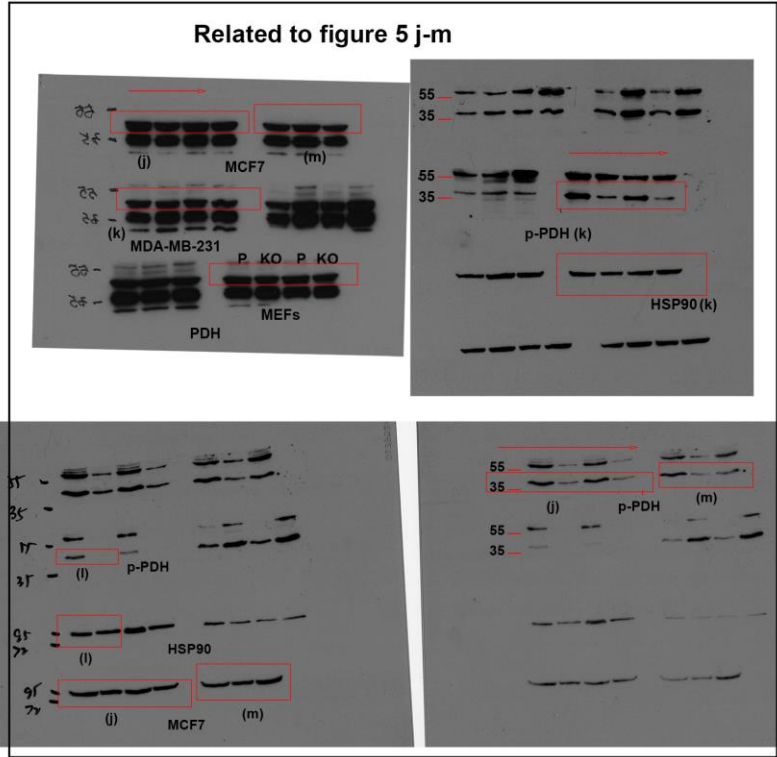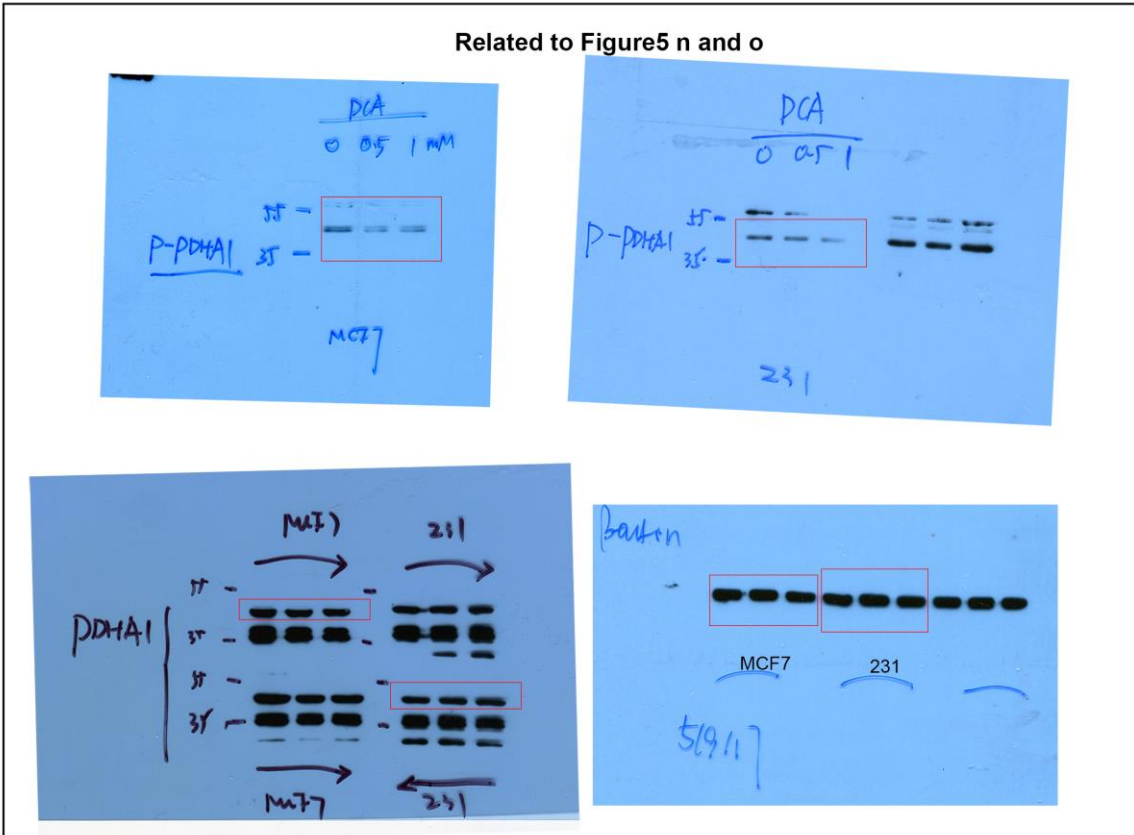

Supplementary Figure 9 continued

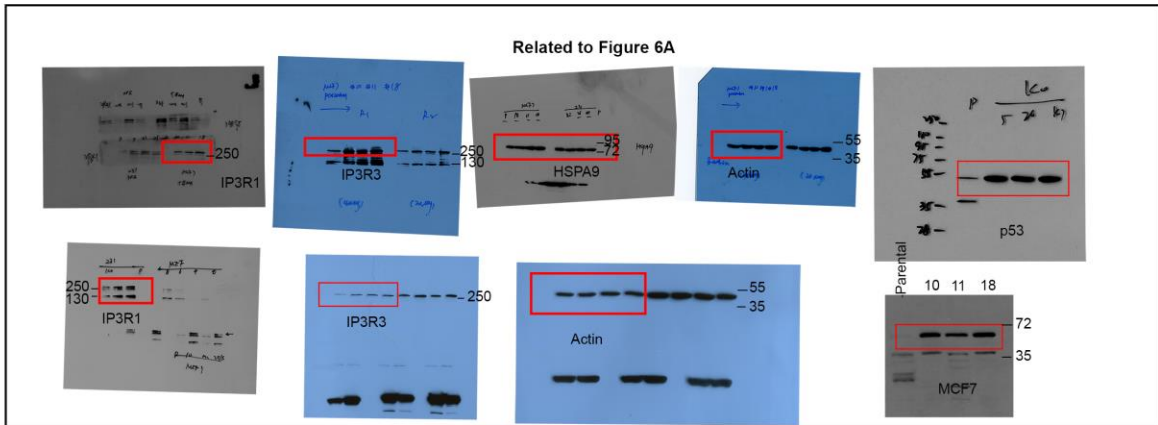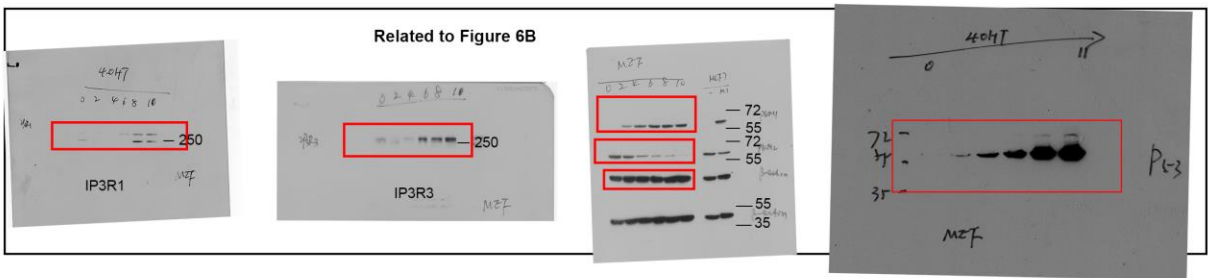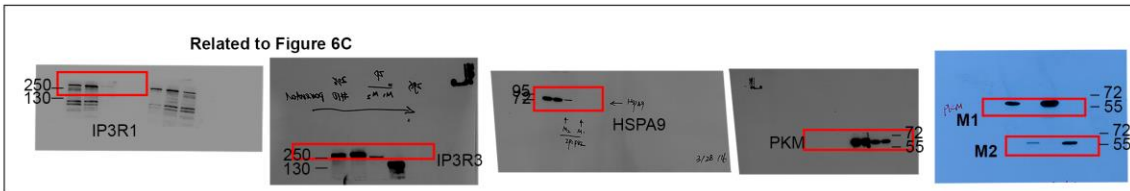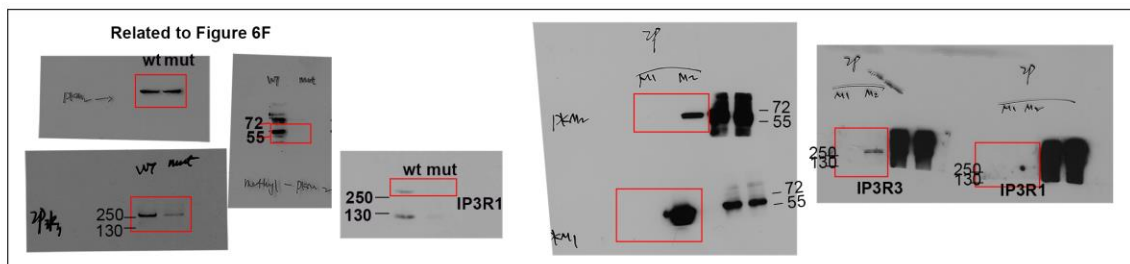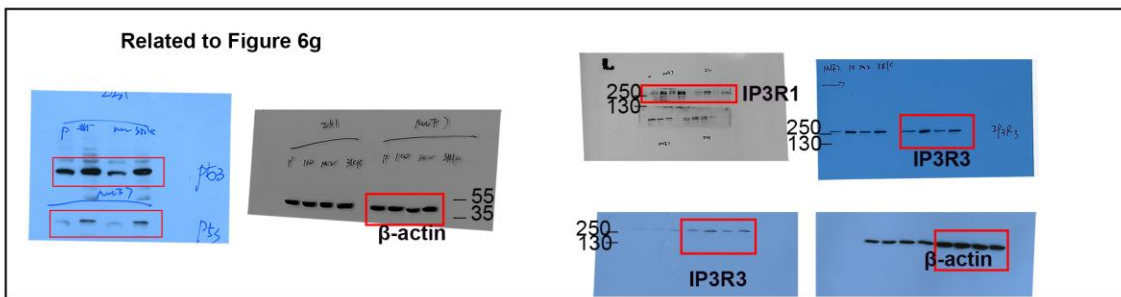

Supplementary Figure 9 continued

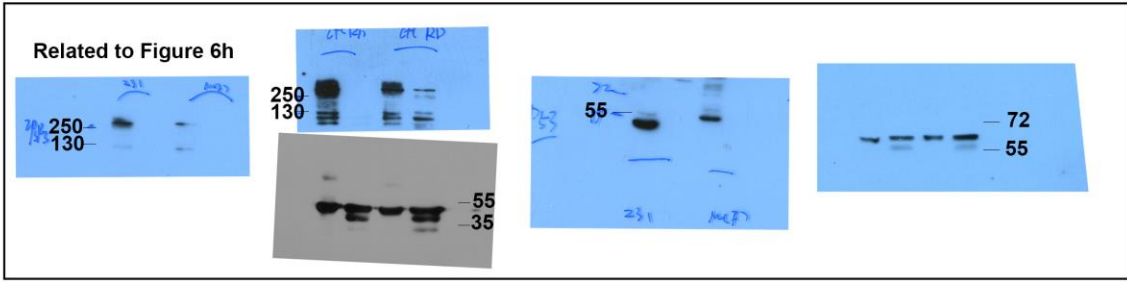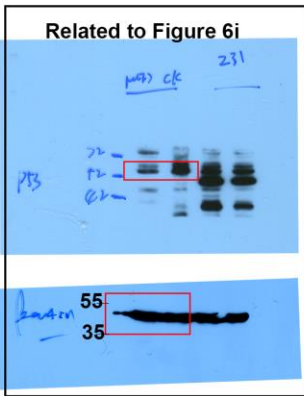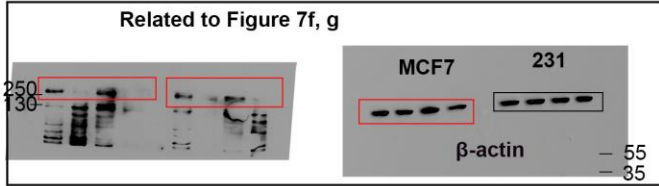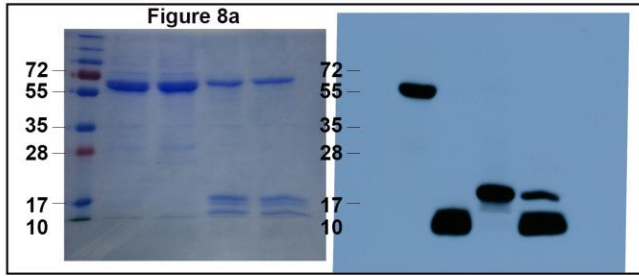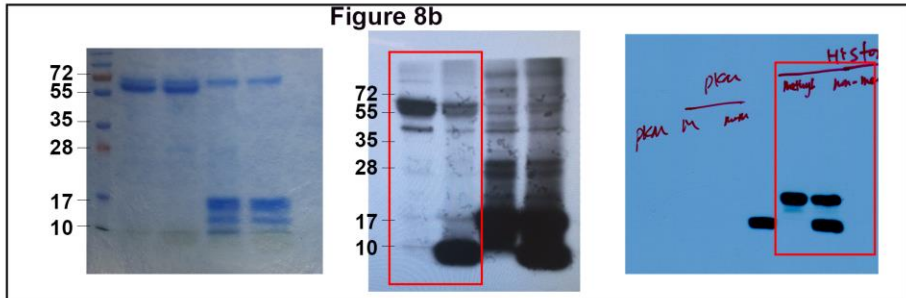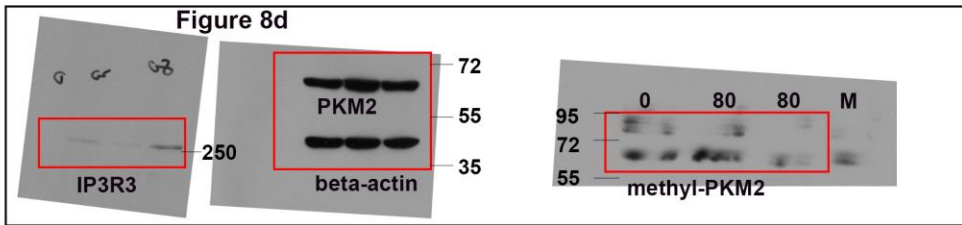

Supplementary Figure 9 continued



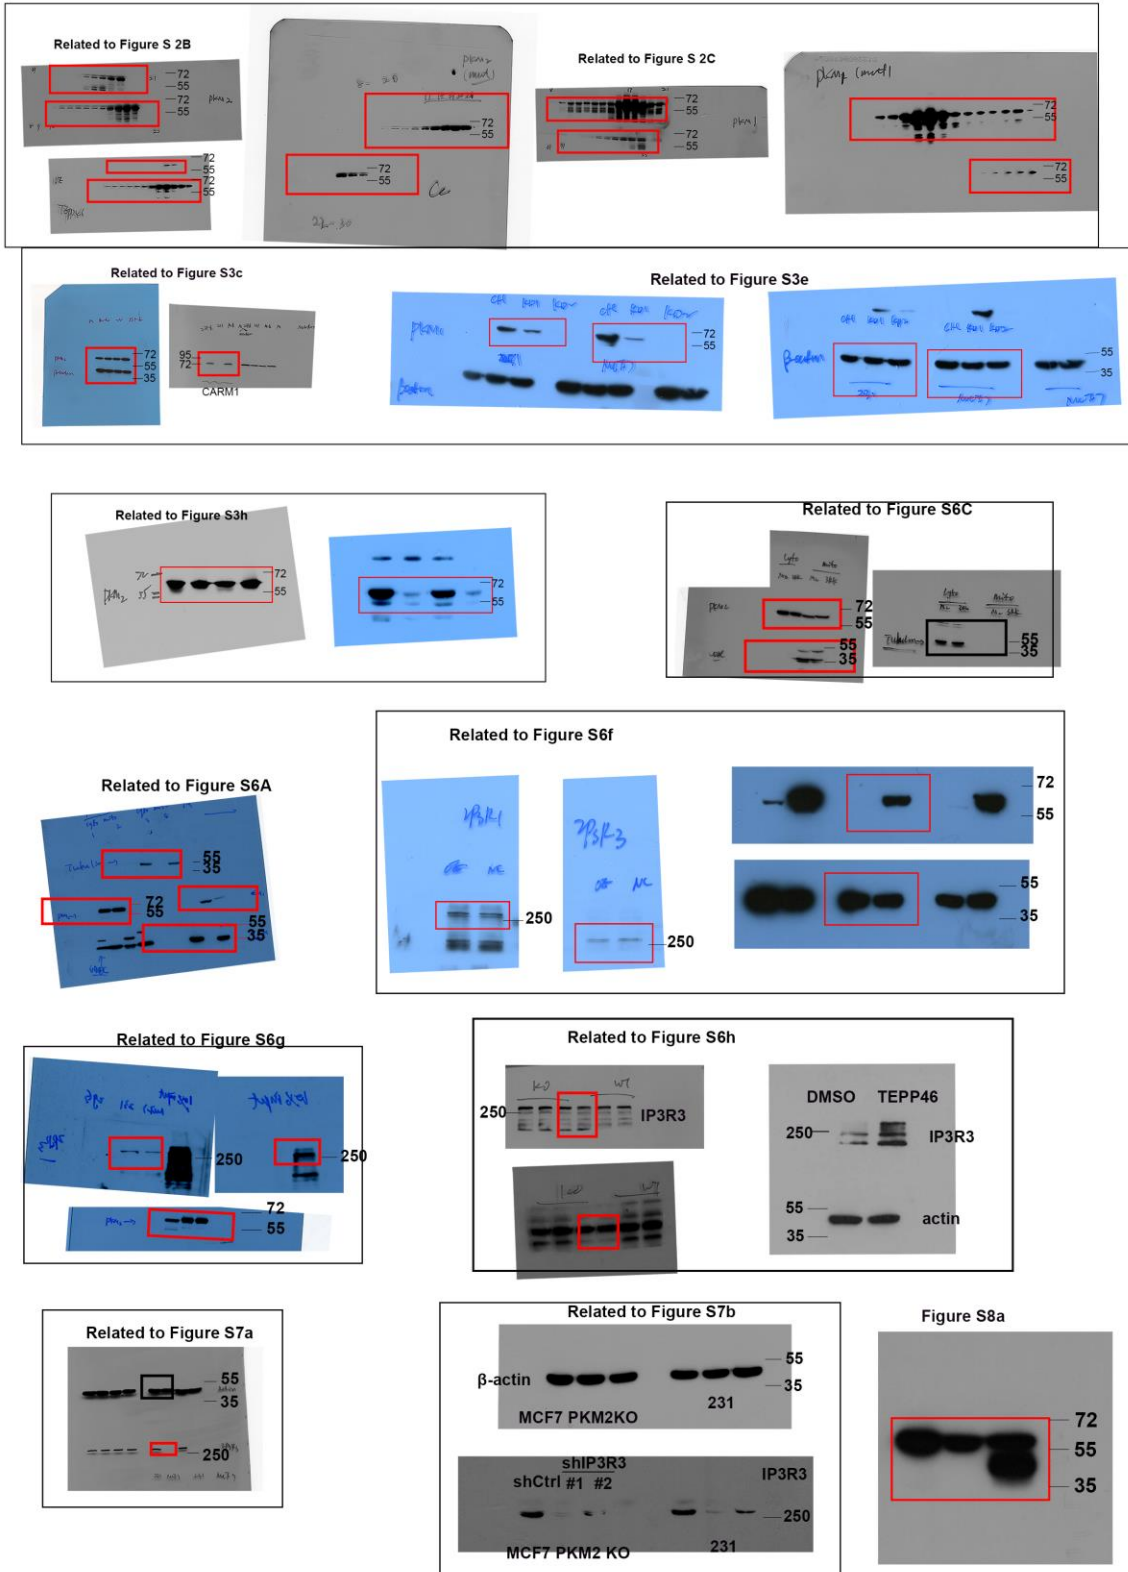

Supplementary Figure 9
